# Supplementary material
Source: publisher figshare collection journal article supplement (https://gsajournals.figshare.com/articles/dataset/_/6167501)
Supplement: Supplementary file 1 [file 1]

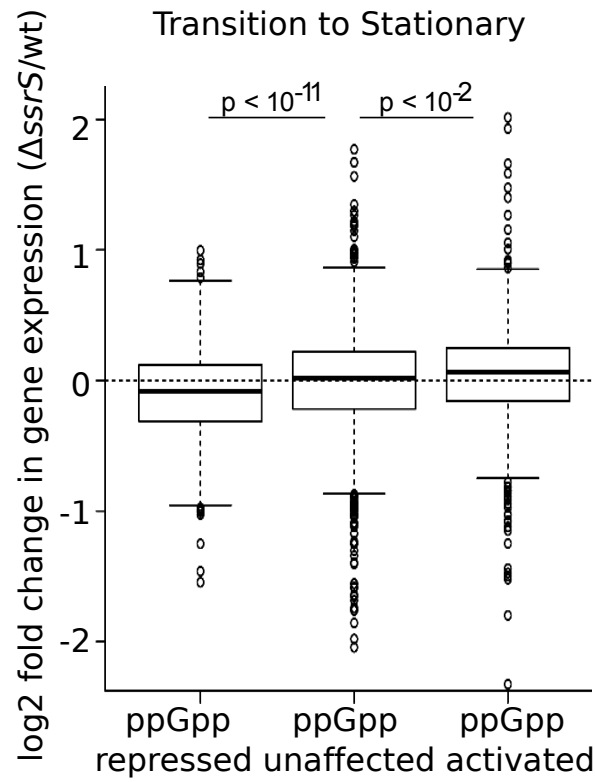

Figure S8: Boxplots of log2 fold change in gene expression ( $\Delta ssrS$ /wild-type) during the transition to stationary phase, for 710 genes repressed by ppGpp, 3159 genes unaffected by ppGpp, and 704 genes activated by ppGpp (gene lists obtained from Traxler et al. 2008). p-values are for Wilcoxon Test.
