# Supplementary material
Source: publisher figshare collection journal article supplement (https://gsajournals.figshare.com/articles/dataset/_/6167501)
Supplement: Supplementary file 2 [file 1]

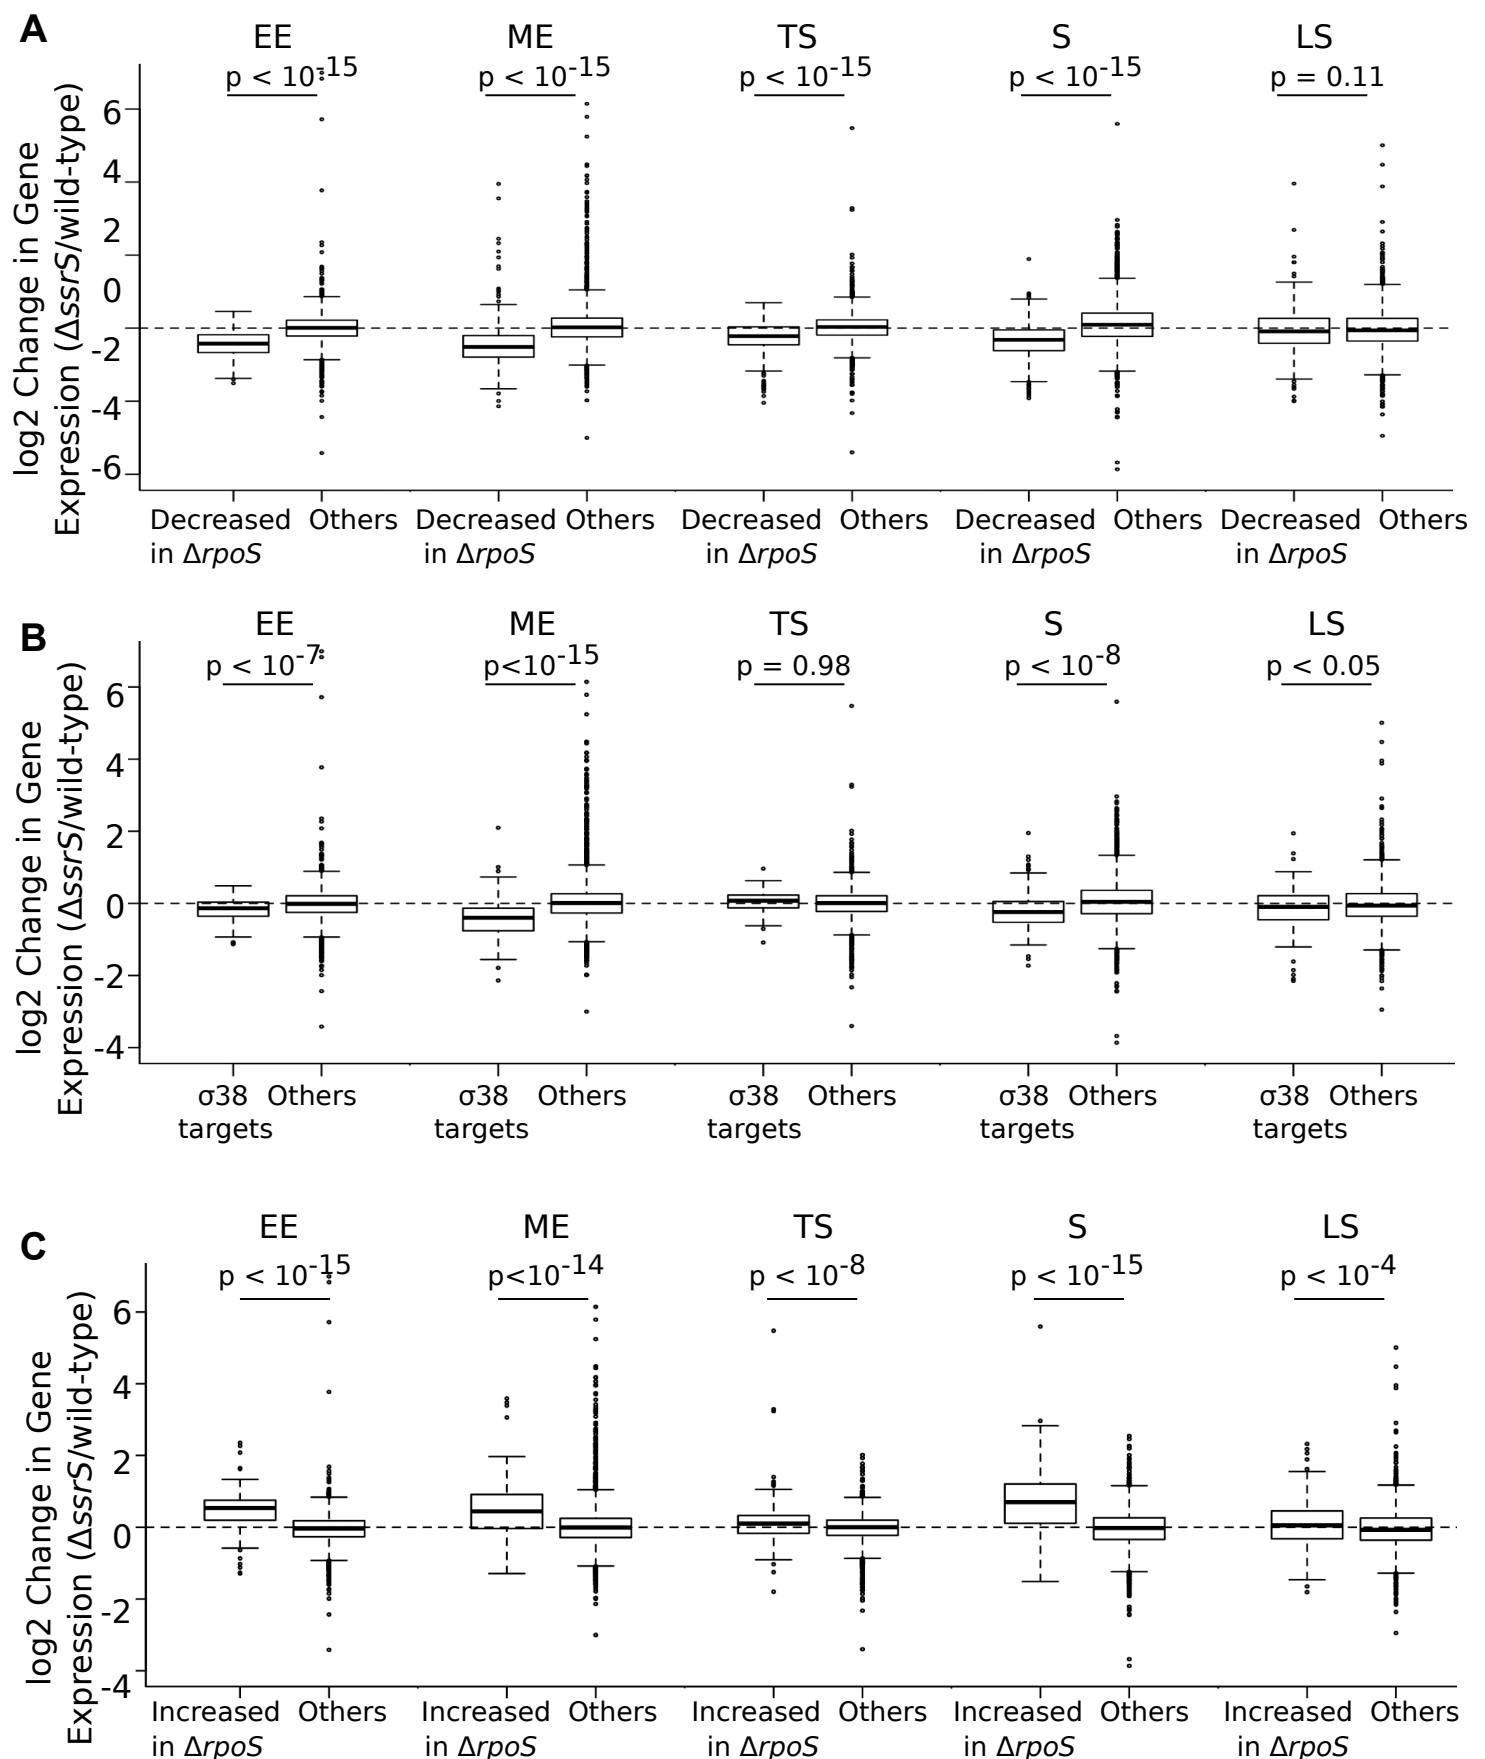

Figure S6: (A) Boxplots of log2 fold change in gene expression ( $\Delta ssrS$ /wild-type) for genes whose expression is significantly reduced in  $\Delta rpoS$  in the indicated growth phase, compared to all other genes. (B) Boxplots of log2 fold change in gene expression ( $\Delta ssrS$ /wild-type) for reported  $\sigma 38$  targets in the indicated growth phase, compared to all other genes. (C) Boxplots of log2 fold change in gene expression ( $\Delta ssrS$ /wild-type) for genes whose expression is significantly increased in  $\Delta rpoS$  in the indicated growth phase, compared to all other genes. p-values are for Wilcoxon Test.
