# Supplementary material
Source: publisher figshare collection journal article supplement (https://gsajournals.figshare.com/articles/dataset/_/6167501)
Supplement: Supplementary file 3 [file 1]

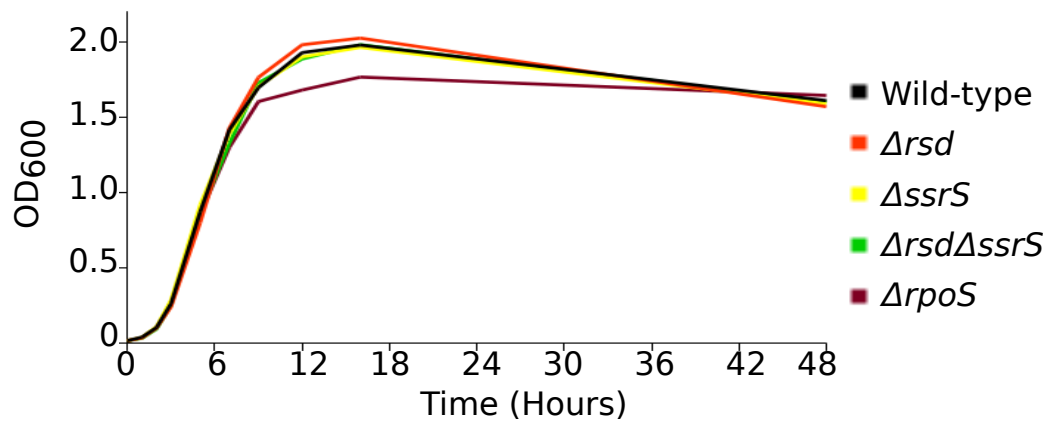

Figure S1: Sample growth curves of wild-type *E. coli* and the mutant strains used for RNA-Seq. Overnight cultures were diluted 1:100 in fresh M9 Glucose medium and growth was estimated by measuring optical density at 600 nm.
