# Supplementary material
Source: publisher figshare collection journal article supplement (https://gsajournals.figshare.com/articles/dataset/_/6167501)
Supplement: Supplementary file 5 [file 1]

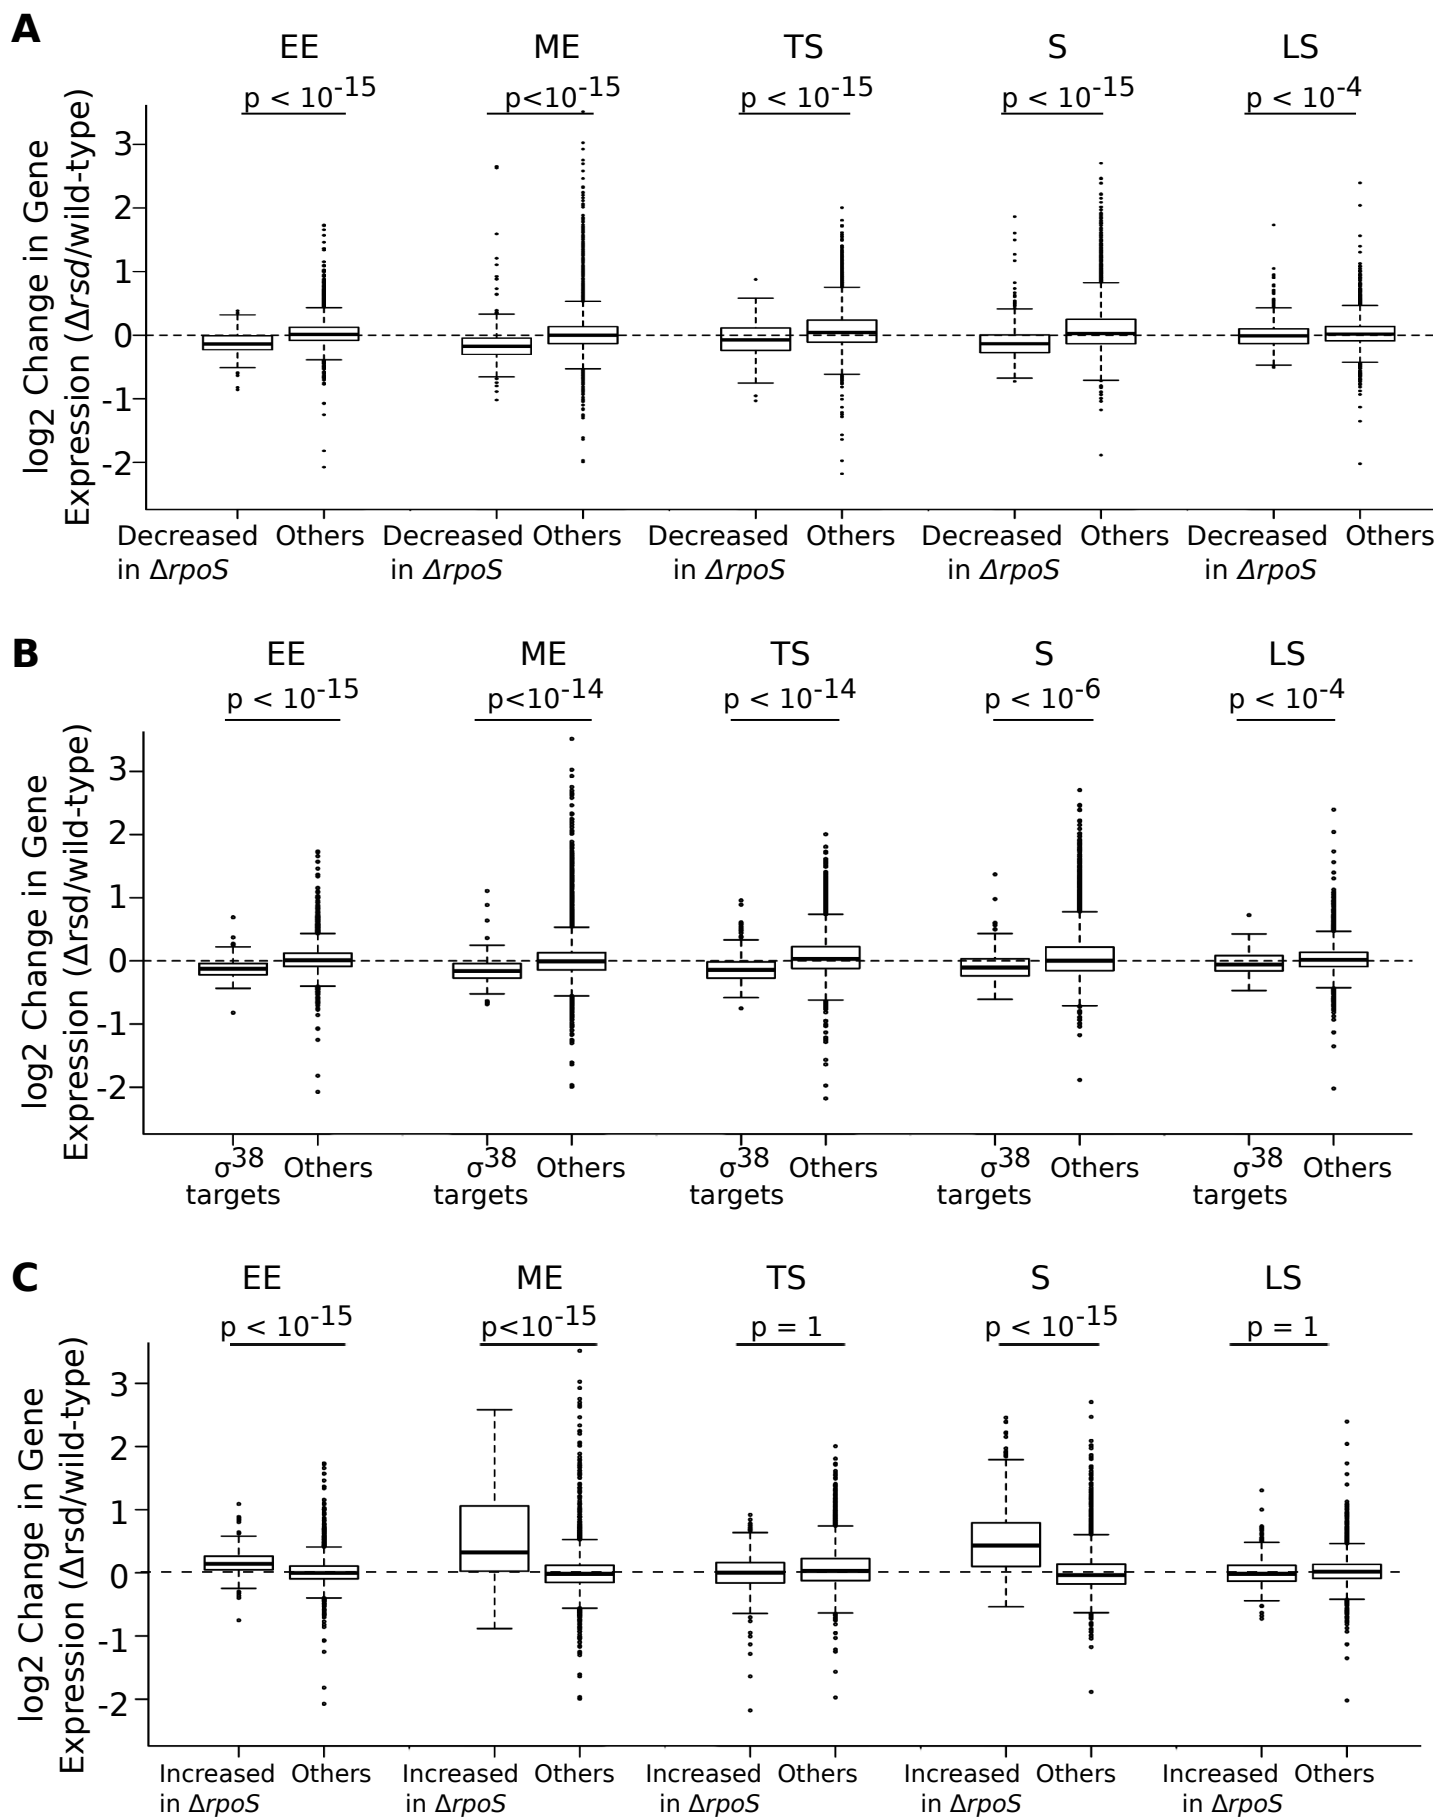

Figure S2: (A) Boxplots of log<sub>2</sub> fold change in expression ( $\Delta$ rsd/wild-type) for genes whose expression is significantly reduced in  $\Delta$ rpoS in the indicated growth phase, compared to all other genes. (B) Boxplots of log<sub>2</sub> fold change in expression ( $\Delta$ rsd/wild-type) for reported  $\sigma^{38}$  targets in the indicated growth phase, compared to all other genes. (C) Boxplots of log<sub>2</sub> fold change in expression ( $\Delta$ rsd/wild-type) for genes whose expression is significantly increased in  $\Delta$ rpoS in the indicated growth phase, compared to all other genes. p-values are for Wilcoxon Test.
