# Supplementary material
Source: publisher figshare collection journal article supplement (https://gsajournals.figshare.com/articles/dataset/_/6167501)
Supplement: Supplementary file 6 [file 1]

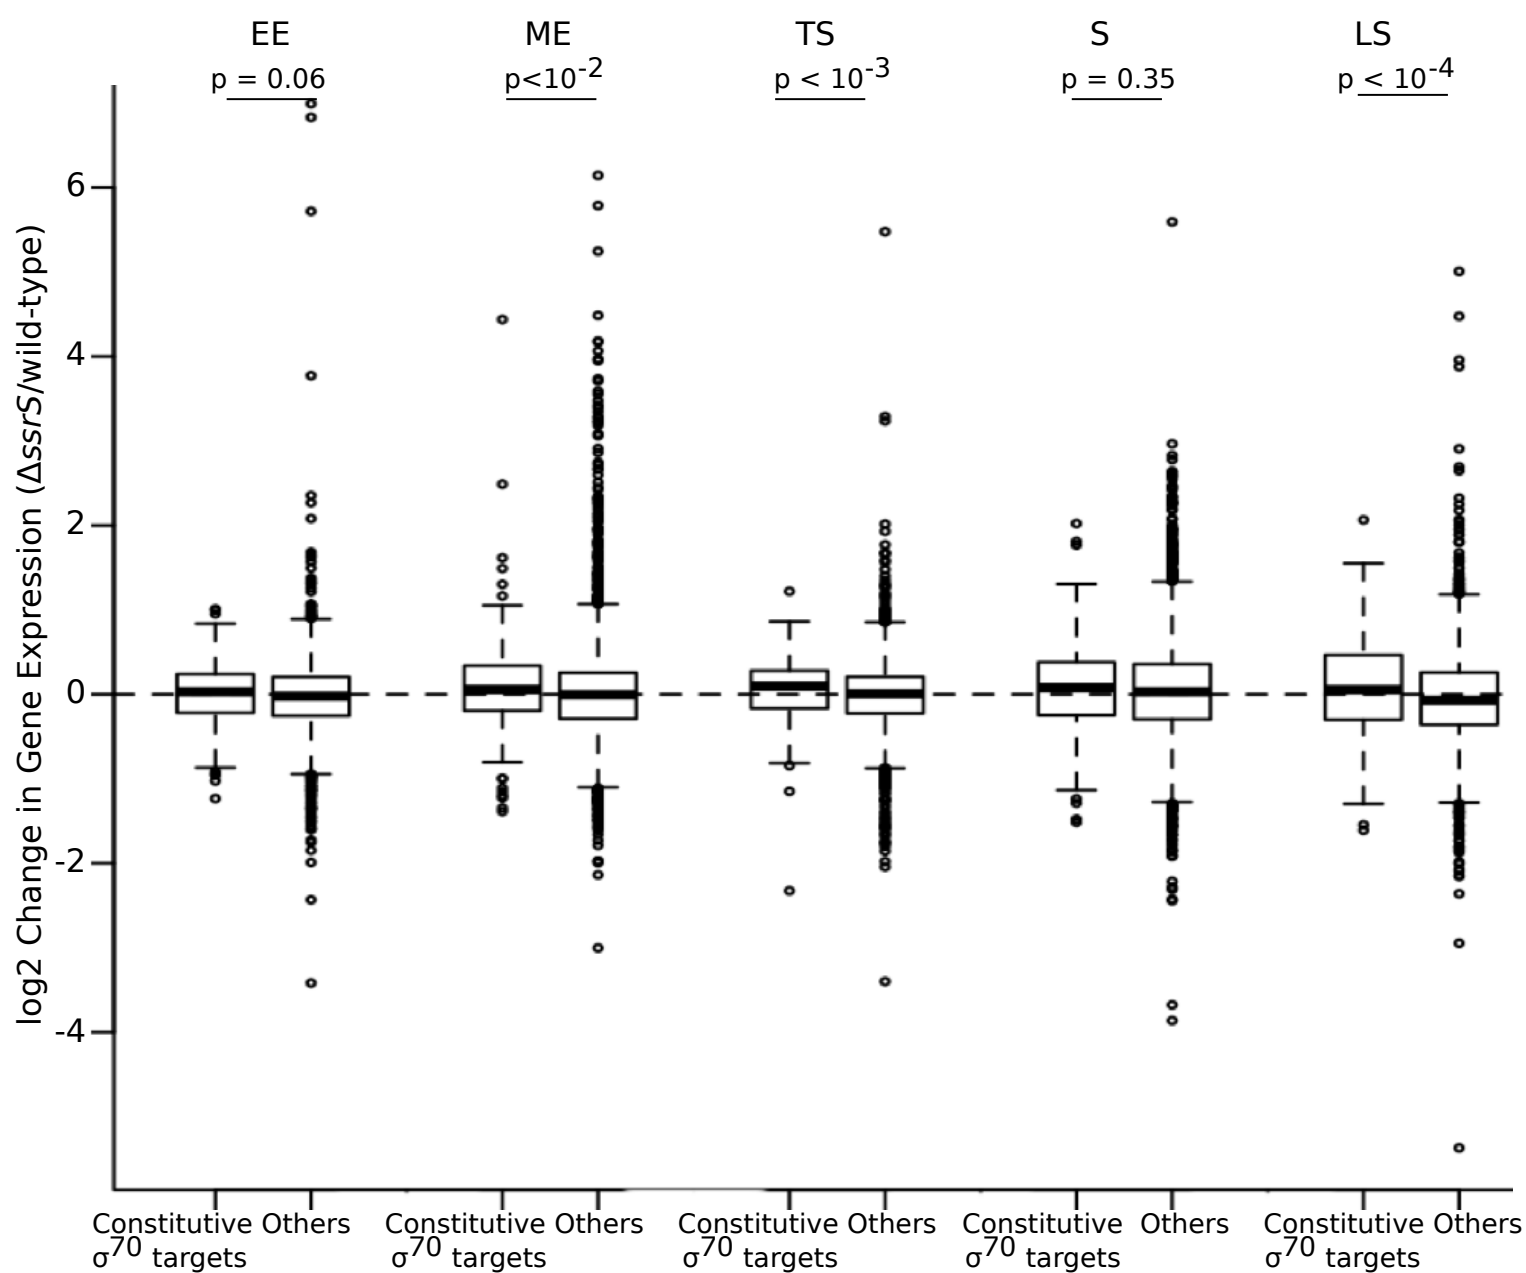

Figure S7: Boxplots of log<sub>2</sub> fold change in gene expression ( $\Delta ssrS/wild-type$ ) for 270 genes whose expression is controlled by constitutive  $\sigma^{70}$ -dependent promoters, compared to all other genes, in the indicated growth phase. p-values are for Wilcoxon Test.
