# Supplementary material
Source: publisher figshare collection journal article supplement (https://gsajournals.figshare.com/articles/dataset/_/6167501)
Supplement: Supplementary file 7 [file 1]

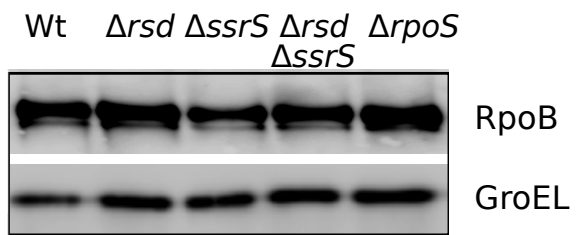

Figure S10: Western blot showing expression of RNA polymerase  $\beta$  subunit (RpoB) during stationary phase, in the five strains used for RNA-Seq. GroEL was used as a loading control.
