# Supplementary material
Source: publisher figshare collection journal article supplement (https://gsajournals.figshare.com/articles/dataset/_/6167501)
Supplement: Supplementary file 9 [file 1]

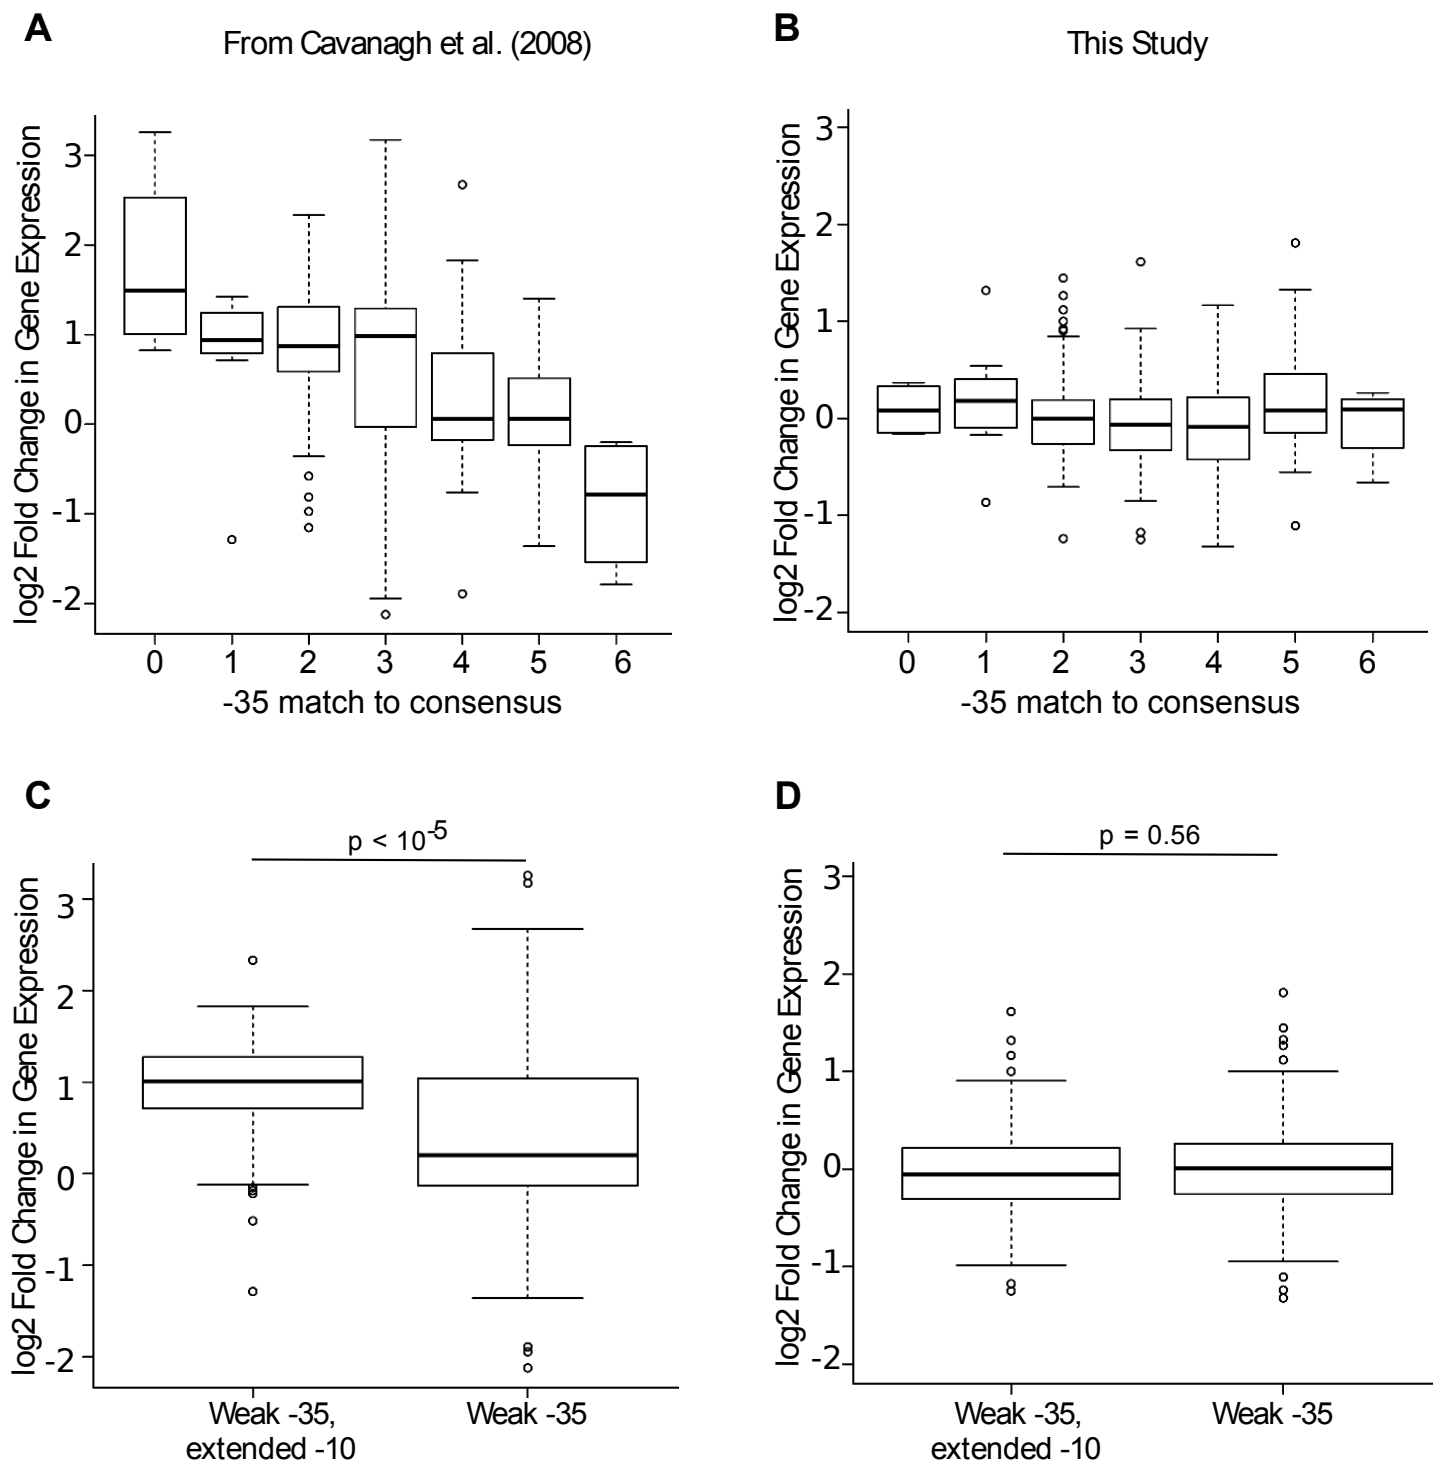

Figure S11: (A) Boxplots of log2 fold change in gene expression ( $\Delta ssrS$ /wild-type) for genes as a function of the number of nucleotides in their promoter -35 sequence that match to consensus, for a set of 312 mapped  $\sigma 70$  promoters, based on the data of Cavanagh *et al.* 2008. (B) Boxplots showing log2 fold change in expression ( $\Delta ssrS$ /wild-type) of the same genes in our dataset. (C) Boxplots showing log2 fold change in gene expression ( $\Delta ssrS$ /wild-type) for 77 genes whose promoters have a weak -35 element and extended -10 element, compared to 72 genes with a weak -35 element only, based on the data of Cavanagh *et al.* 2008. (D) Boxplots showing log2 fold change in gene expression ( $\Delta ssrS$ /wild-type) for the same genes in our dataset. p-values are for Wilcoxon Test.
