# Supplementary material
Source: publisher figshare collection journal article supplement (https://gsajournals.figshare.com/articles/dataset/_/6167501)
Supplement: Supplementary file 10 [file 1]

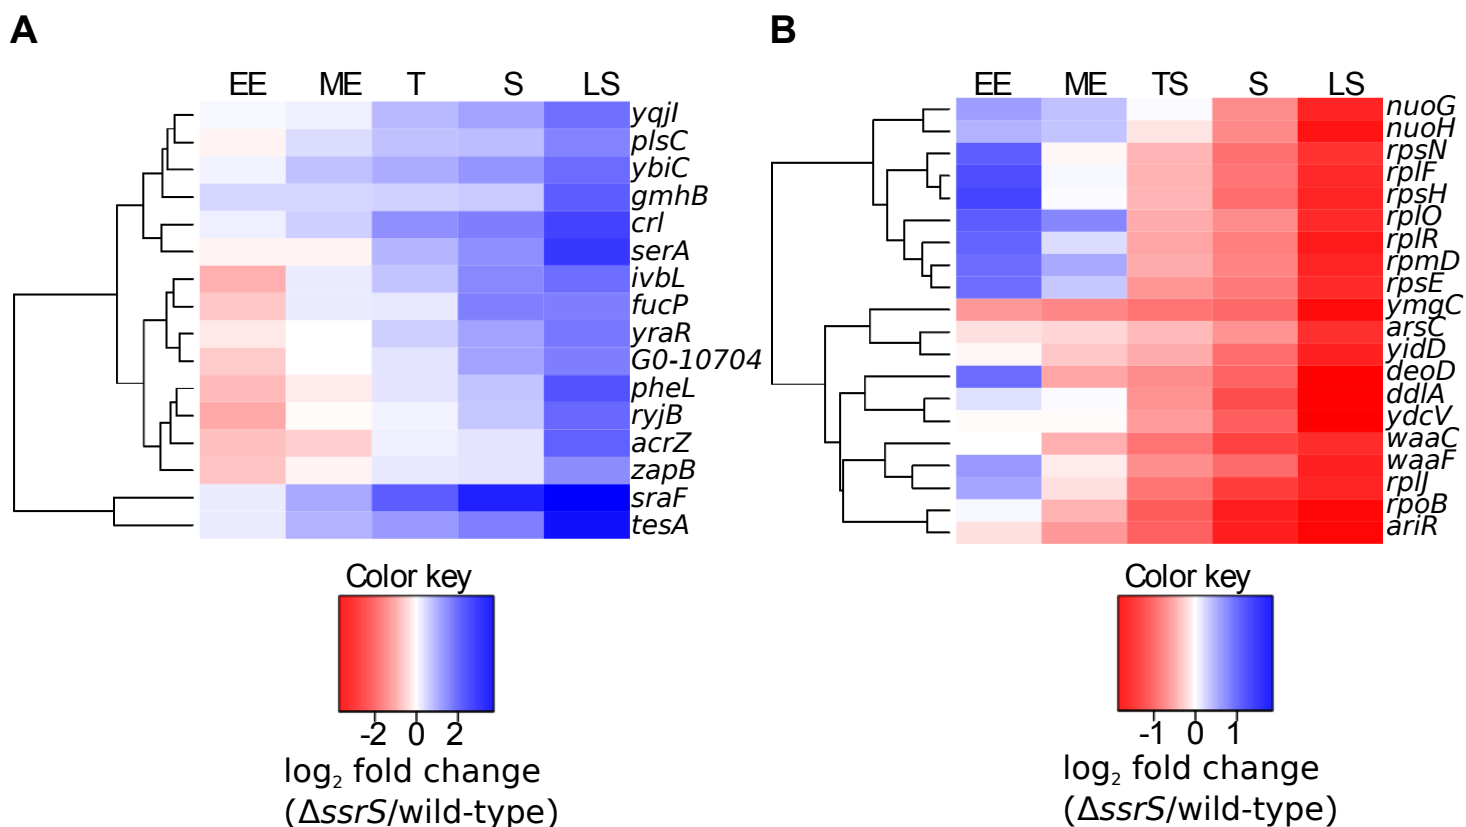

Figure S9: Heatmaps showing the log<sub>2</sub> fold change in expression, in successive growth phases, of (A) 16 genes whose expression was increased in  $\Delta$ *ssrS*/wild-type, with the magnitude of this increase increasing in successive growth phases, and (B) 20 genes whose expression was reduced in  $\Delta$ *ssrS*/wild-type, with the magnitude of this reduction increasing in successive growth phases.
