# Supplementary material
Source: publisher figshare collection journal article supplement (https://gsajournals.figshare.com/articles/dataset/_/6167501)
Supplement: Supplementary file 12 [file 1]

## File S1: Selection of model parameters

**Cell volume:** Bacterial cell volume varies with growth phase, increasing to  $3 \mu\text{m}^3$  during exponential phase but falling to  $1 \mu\text{m}^3$  in stationary phase<sup>1</sup>. We therefore adopted a value of  $1 \mu\text{m}^3$  ( $= 10^{-15}$  L) for cell volume during stationary phase. With this value, 1 molecule/cell  $= 1.66$  nM.

**Total RNA polymerase,  $\sigma^{70}$ ,  $\sigma^{38}$  and Rsd per cell:** Measured values for total RNA polymerase and sigma factors have varied greatly depending upon cellular growth phase and growth rate. A list of values measured under various conditions is given in<sup>2</sup>. As we are modeling conditions during stationary phase, we have adopted values measured during stationary phase in *E. coli* MG1655 using quantitative western blotting<sup>3</sup>.

**Total 6S RNA per cell:** Wassarman and Storz<sup>4</sup> showed that 6S RNA increases steadily throughout growth and stationary phase, from 1000 molecules/cell in exponential phase to 10,000 molecules/cell in late stationary phase (24 hours). Our data also indicates that the concentration of 6S RNA continues to increase throughout stationary phase. We therefore adopted a value of 8000 molecules/cell  $\approx 13000$  nM, consistent with an earlier time point in stationary phase.

**$K_{E\sigma 70}$ ,  $K_{E\sigma 38}$ :** Measured values for E- $\sigma$  dissociation constants have varied greatly with temperature and ionic conditions, although all measurements agree that E- $\sigma^{70}$  binding is considerably stronger than E- $\sigma^{38}$ . A list of measured values under various conditions is given in<sup>2</sup>. We have used values measured under high-salt conditions in the presence of glutamate, similar to cellular conditions in stationary phase<sup>5</sup>. However, we have also run the model with values from other studies<sup>6,7</sup>, and obtained similar results.

**$K_{6S}$ :** The dissociation constant for *E. coli* 6S RNA and RNA polymerase has not been measured to our knowledge. However, a dissociation constant of 131 nM has been measured for the binding of RNA polymerase and 6S RNA -1 from *Bacillus subtilis*, which is similar in structure and expression pattern to *E. coli* 6S RNA<sup>8</sup>. Increasing or decreasing this parameter by 5-fold does not substantially affect our findings.

**Nonspecific binding:** *E. coli* has  $\sim 4.6 \times 10^6$  base pairs per genome, each of which can potentially be a non-specific binding site. Assuming that stationary phase cells have a single copy of the genome, we adopted this as the number of non-specific DNA binding sites. *In vitro* experiments<sup>9</sup> under ionic conditions similar to physiological conditions found that the non-specific dissociation constants of E $\sigma^{70}$  and core were comparable ( $10^{-3} - 10^{-4}$  M). We assumed that the non-specific binding affinity of E $\sigma^{38}$  would be similar to these, and used a value of  $10^{-4}$  M for all non-specific binding.

**Promoter binding and transcription:** In the *E. coli* genome, it is estimated that  $\sim 1000$  promoters are under the control of E $\sigma^{70}$  and  $\sim 200$  under E $\sigma^{38}$  (RegulonDB database). However, not all promoters are active at any time, and many can be bound by both holoenzymes. In particular, the activity of E $\sigma^{70}$  promoters is strongly reduced during stationary phase. We therefore adopted a value of 200 active promoters/cell for each sigma factor. Promoter binding affinities were chosen to be comparable with values in<sup>10</sup> and<sup>11</sup>. The promoter clearance rate was also chosen to be comparable with values in<sup>2</sup> and<sup>12</sup>. For simplicity, we have assumed that the sigma factor is released immediately upon initiation, as shown below.

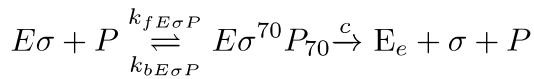

In steady state, this must satisfy the equation:

$$\frac{k_{bE\sigma P} + c}{k_{fE\sigma P}} = K_{E\sigma P}$$

We assumed that the promoter clearance rate is considerably smaller than  $k_{bE\sigma P}$  and thus approximated:

$$\frac{k_{bE\sigma P}}{k_{fE\sigma P}} \approx K_{E\sigma P}$$

**Transcription Elongation:** The rate of elongation by RNA polymerase depends on growth conditions and the transcribed sequence, and is reduced in stationary phase. Proshkin et al.<sup>13</sup> measured elongation rates of 42 nt s<sup>-1</sup> in exponential phase and 21 nt s<sup>-1</sup> in stationary phase. Assuming an average operon length of 1000 nt, the transcribing RNA polymerase would be released at a rate of 21/1000 = 0.021 s<sup>-1</sup>.

## References

1. Ali Azam,T., Iwata,A., Nishimura,A., Ueda,S. and Ishihama,A. (1999) Growth phase-dependent variation in protein composition of the Escherichia coli nucleoid. *J. Bacteriol.*, **181**, 6361–6370.
2. Mauri,M. and Klumpp,S. (2014) A model for sigma factor competition in bacterial cells. *PLoS Comput. Biol.*, **10**, e1003845.
3. Piper,S.E., Mitchell,J.E., Lee,D.J. and Busby,S.J.W. (2009) A global view of Escherichia coli Rsd protein and its interactions. *Mol. Biosyst.*, **5**, 1943–1947.
4. Wassarman,K.M. and Storz,G. (2000) 6S RNA regulates E. coli RNA polymerase activity. *Cell*, **101**, 613–623.
5. Colland,F., Fujita,N., Ishihama,A. and Kolb,A. (2002) The interaction between sigmaS, the stationary phase sigma factor, and the core enzyme of Escherichia coli RNA polymerase. *Genes Cells Devoted Mol. Cell. Mech.*, **7**, 233–247.
6. Maeda,H., Fujita,N. and Ishihama,A. (2000) Competition among seven Escherichia coli  $\sigma$  subunits: relative binding affinities to the core RNA polymerase. *Nucleic Acids Res.*, **28**, 3497–3503.
7. Ganguly,A. and Chatterji,D. (2012) A comparative kinetic and thermodynamic perspective of the  $\sigma$ -competition model in Escherichia coli. *Biophys. J.*, **103**, 1325–1333.
8. Beckmann,B.M., Burenina,O.Y., Hoch,P.G., Kubareva,E.A., Sharma,C.M. and Hartmann,R.K. (2011) In vivo and in vitro analysis of 6S RNA-templated short transcripts in Bacillus subtilis. *RNA Biol.*, **8**, 839–849.
9. deHaseth,P.L., Lohman,T.M., Burgess,R.R. and Record,M.T. (1978) Nonspecific interactions of Escherichia coli RNA polymerase with native and denatured DNA:

differences in the binding behavior of core and holoenzyme. *Biochemistry (Mosc.)*, **17**, 1612–1622.

10. deHaseth, P.L., Zupancic, M.L. and Record, M.T. (1998) RNA polymerase-promoter interactions: the comings and goings of RNA polymerase. *J. Bacteriol.*, **180**, 3019–3025.
11. Bintu, L., Buchler, N.E., Garcia, H.G., Gerland, U., Hwa, T., Kondev, J. and Phillips, R. (2005) Transcriptional regulation by the numbers: models. *Curr. Opin. Genet. Dev.*, **15**, 116–124.
12. Smith, T.L. and Sauer, R.T. (1996) Dual regulation of open-complex formation and promoter clearance by Arc explains a novel repressor to activator switch. *Proc. Natl. Acad. Sci. U. S. A.*, **93**, 8868–8872.
13. Proshkin, S., Rahmouni, A.R., Mironov, A. and Nudler, E. (2010) Cooperation between translating ribosomes and RNA polymerase in transcription elongation. *Science*, **328**, 504–508.
