# Supplementary material
Source: publisher figshare collection journal article supplement (https://gsajournals.figshare.com/articles/dataset/_/6167501)
Supplement: Supplementary file 13 [file 1]

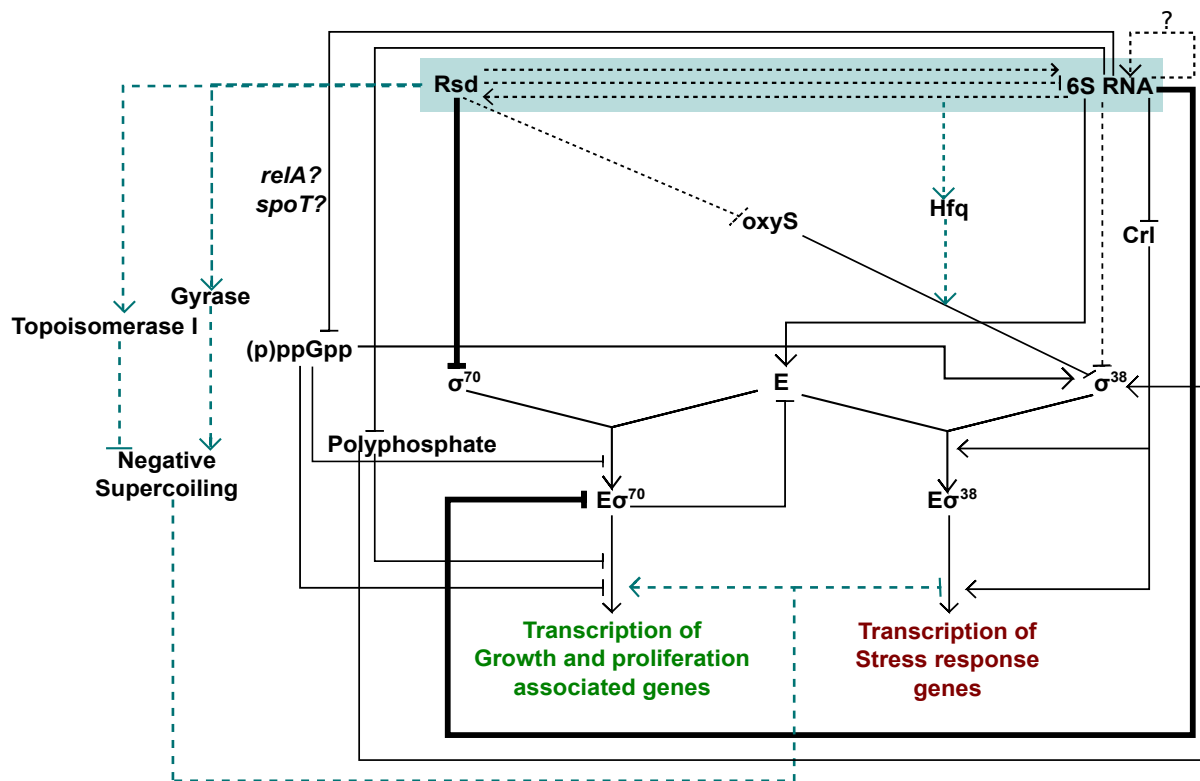

Figure S12: A schematic showing various pathways by which Rsd and 6S RNA have been proposed to regulate RNA polymerase. Bold lines represent sequestration into inactive complexes. All dotted lines represent interactions newly discovered or suggested by this study. Blue lines represent pathways which are affected only in the Rsd-6S RNA double knockout. The three arrows connecting Rsd and 6S RNA show that Rsd inhibits expression of 6S RNA (in stationary phase) and activates it (in ME phase), while 6S RNA increases expression of Rsd. The question mark indicates the possibility that 6S RNA is autoregulatory.
