# Supplementary material
Source: publisher figshare collection journal article supplement (https://gsajournals.figshare.com/articles/dataset/_/6167501)
Supplement: Supplementary file 15 [file 1]

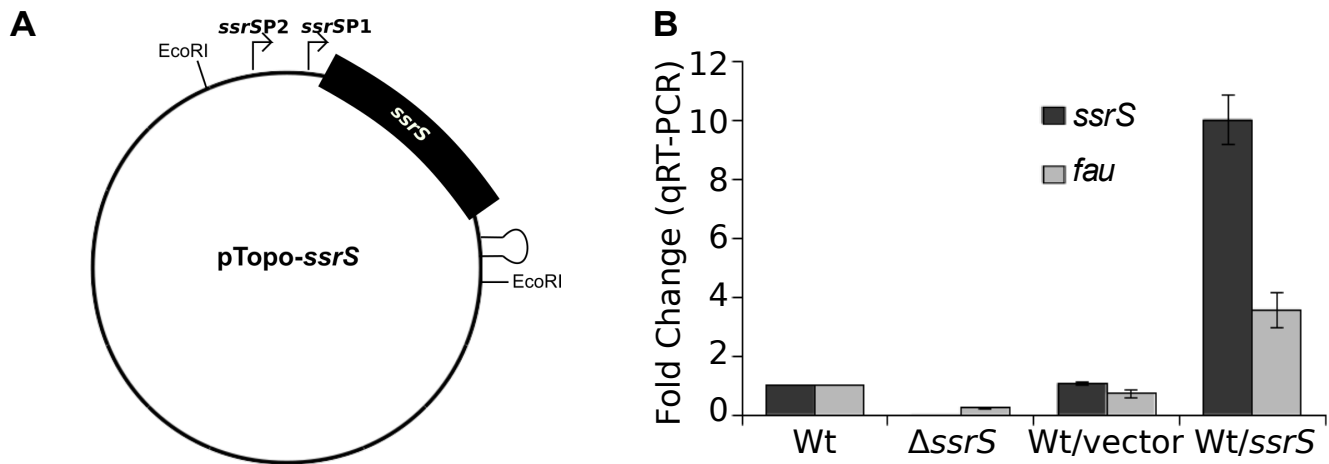

Figure S5: A) Schematic of plasmid pTopo-*ssrS*, used for overexpressing 6S RNA. This plasmid was produced by amplifying a DNA segment containing the *ssrS* gene, both its promoters and its terminator, from genomic DNA by PCR (primers in Table S4), and cloning it into the pCR2.1-TOPO vector using the TOPO TA Cloning Kit (Invitrogen, K4500). B) Fold change in expression (qRT-PCR) of *ssrS* (dark gray) and *fau* (light gray) RNA in wild-type (both set to 1),  $\Delta ssrS$ , wild-type transformed with empty vector, and wild-type transformed with pTopo-*ssrS*, during stationary phase. Data represent mean  $\pm$  SEM for 3 biological replicates. Empty vector was produced by digesting pTOPO-*ssrS* with EcoRI to remove the insert, and eluting and self-ligating the digested vector.
